# Supplementary material
Source: PubMed Central journal article supplement (PMC6439557)

## Supplementary Online Content

Meghji Z, Nguyen A, Fatima B, et al. Survival differences in women and men after septal myectomy for obstructive hypertrophic cardiomyopathy. *JAMA Cardiol*. Published online February 27, 2019. doi:10.1001/jamacardio.2019.0084

**eTable.** Baseline Characteristics over the Study Period

**eFigure.** Temporal trend in baseline characteristics by sex. Curve estimates trend over time stratified by sex using a locally weighted scatterplot smooth (loess).

This supplementary material has been provided by the authors to give readers additional information about their work.

**eTable. Baseline Characteristics over the Study Period**

| <b>Variable</b>                      | <b>N</b> | <b>Women</b>       | <b>Men</b>        |
|--------------------------------------|----------|--------------------|-------------------|
| <b>Age</b>                           |          |                    |                   |
| 1960-79                              | 49       | 47.5 (37.9, 63.9)  | 43.0 (30.9, 53.2) |
| 1980-89                              | 76       | 58.1 (36.4, 67.1)  | 48.9 (37.0, 61.9) |
| 1990-99                              | 276      | 59.2 (41.6, 68.6)  | 49.7 (38.4, 61.5) |
| 2000-09                              | 985      | 56.9 (45.8, 68.8)  | 52.0 (43.4, 62.0) |
| 2010-16                              | 1,129    | 61.1 (49.8, 68.1)  | 54.8 (44.9, 63.7) |
| <b>NYHA class III or IV</b>          |          |                    |                   |
| 1960-79                              | 49       | 16 (72.7%)         | 20 (74.1%)        |
| 1980-89                              | 76       | 33 (91.7%)         | 36 (90.0%)        |
| 1990-99                              | 276      | 132 (93.6%)        | 112 (88.9%)       |
| 2000-09                              | 985      | 364 (87.9%)        | 474 (83.0%)       |
| 2010-16                              | 1,129    | 478 (93.0%)        | 527 (85.7%)       |
| <b>Resting LVOT gradient</b>         |          |                    |                   |
| 1960-79                              | -        | -                  | -                 |
| 1980-89                              | 55       | 64.0 (36.0, 100.0) | 64.0 (36.0, 94.0) |
| 1990-99                              | 225      | 76.0 (46.0, 102.0) | 61.0 (36.0, 92.0) |
| 2000-09                              | 965      | 67.0 (36.0, 100.0) | 49.0 (21.0, 81.0) |
| 2010-16                              | 1,089    | 64.0 (29.0, 92.0)  | 49.0 (19.0, 77.0) |
| <b>MR grade (moderate to severe)</b> |          |                    |                   |
| 1960-79                              | -        | -                  | -                 |
| 1980-89                              | 68       | 23 (69.7%)         | 19 (54.3%)        |
| 1990-99                              | 261      | 79 (57.7%)         | 61 (49.2%)        |
| 2000-09                              | 980      | 236 (57.4%)        | 235 (41.3%)       |
| 2010-16                              | 1,129    | 267 (51.9%)        | 264 (42.9%)       |

**eFigure.** Temporal trend in baseline characteristics by sex. Curve estimates trend over time stratified by sex using a locally weighted scatterplot smooth (loess).

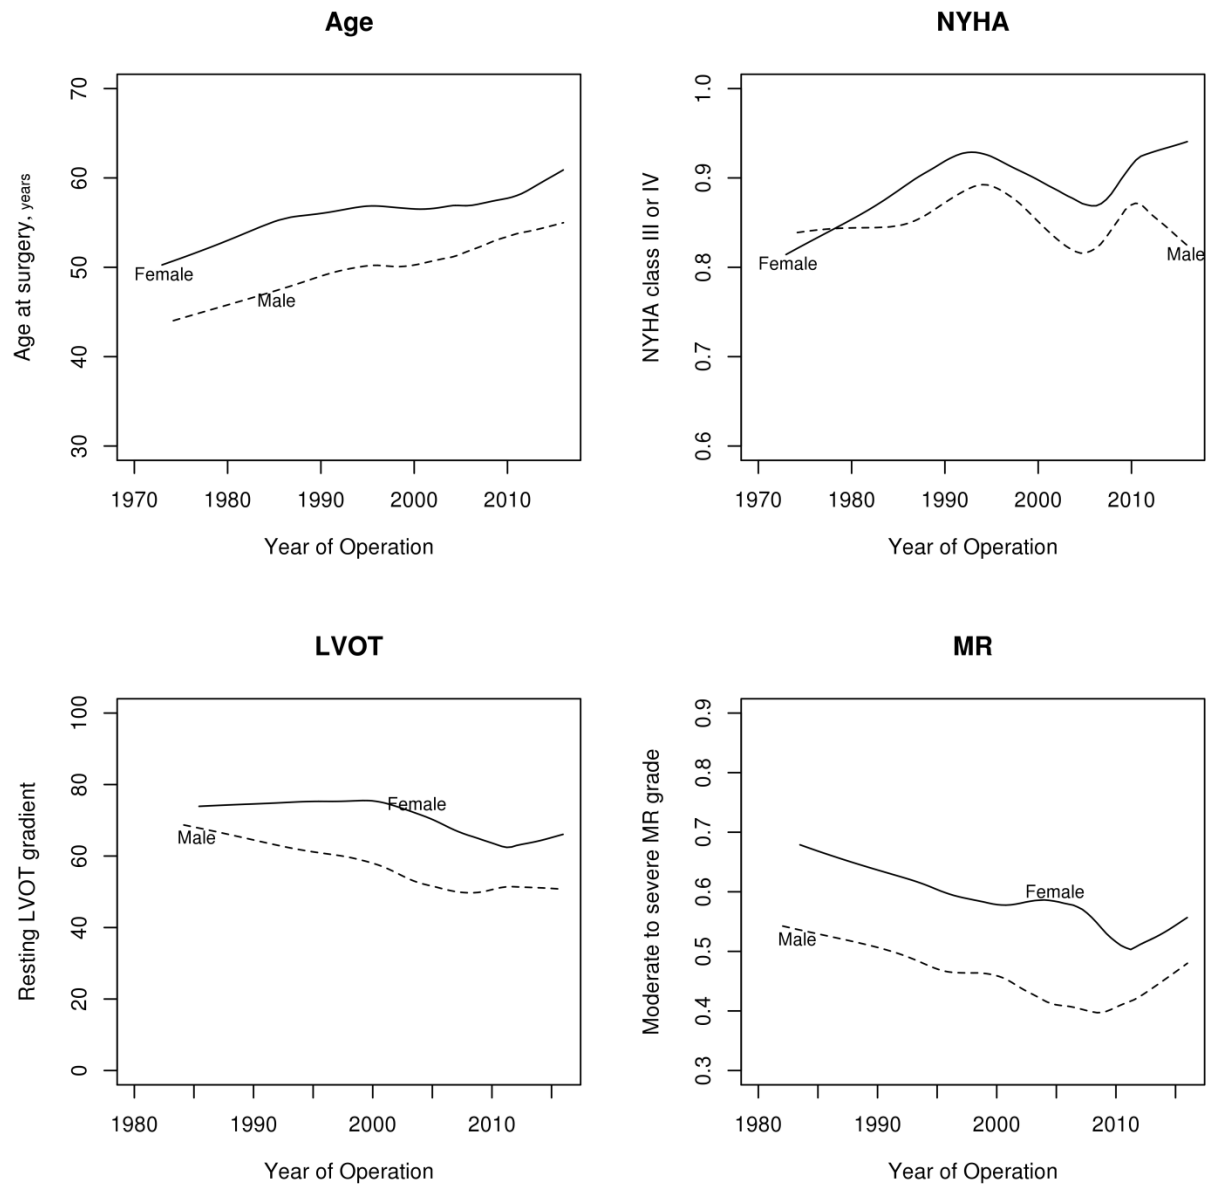

Supplement: jamacardiol-4-237-s001.pdf [file jamacardiol-4-237-s001.pdf]
